# Supplementary material for: Incidence of Syndromes Associated With Frontotemporal Lobar Degeneration in 9 European Countries
Source: PubMed Central journal article supplement — JAMA Neurol. 2023 Jan 30;80(3):279–86. doi: 10.1001/jamaneurol.2022.5128 (PMC9887528; doi:10.1001/jamaneurol.2022.5128), 2023-01-30
Supplement: jamaneurol-e225128-s002.pdf [file jamaneurol-e225128-s002.pdf]

| <b>*Group Name(s): FRONTIERS</b>         |                   |                              |                         |                                                                                                                                                    |                                                 |                                                                |                                                                                                   |
|------------------------------------------|-------------------|------------------------------|-------------------------|----------------------------------------------------------------------------------------------------------------------------------------------------|-------------------------------------------------|----------------------------------------------------------------|---------------------------------------------------------------------------------------------------|
| <b>*First Name and Middle Initial(s)</b> | <b>*Last Name</b> | <b>*Suffix (eg, Jr, III)</b> | <b>Academic Degrees</b> | <b>Institution</b>                                                                                                                                 | <b>Location (city, state/province, country)</b> | <b>Role or Contribution, eg, chair, principal investigator</b> | <b>Group (if more than 1 Group listed in the byline) and/or Subgroup (eg, Steering Committee)</b> |
| Diyana                                   | Belezhanska       |                              | MD                      | UH "Alexandrovska," Department of Neurology, Medical University Sofia                                                                              | Sofia, Bulgaria                                 | Co-investigator                                                |                                                                                                   |
| Angelo                                   | Bianchetti        |                              | MD                      | Geriatric Unit, S. Anna Hospital                                                                                                                   | Brescia, Italy                                  | Co-investigator                                                |                                                                                                   |
| Giuliano                                 | Binetti           |                              | MD                      | MAC Memory Clinic and Molecular Markers Laboratory, IRCCS Istituto Centro San Giovanni di Dio Fatebenefratelli                                     | Brescia, Italy                                  | Co-investigator                                                |                                                                                                   |
| Maria                                    | Cotelli           |                              | PhD                     | Neuropsychology Unit, IRCCS Istituto Centro San Giovanni di Dio Fatebenefratelli                                                                   | Brescia, Italy                                  | Co-investigator                                                |                                                                                                   |
| Maria Sofia                              | Cotelli           |                              | MD                      | Neurology Unit, Vallecamonica Hospital, Esine                                                                                                      | Brescia, Italy                                  | Co-investigator                                                |                                                                                                   |
| Irena                                    | Dreharova         |                              | MD                      | UH "Alexandrovska," Department of Neurology, Medical University Sofia                                                                              | Sofia, Bulgaria                                 | Co-investigator                                                |                                                                                                   |
| Marco                                    | Filardi           |                              | PhD                     | Center for Neurodegenerative Diseases and the Aging Brain, University of Bari-Aldo Moro at Pia Fondazione Cardinale Giovanni Panico, Tricase       | Tricase, Italy                                  | Co-investigator                                                |                                                                                                   |
| Silvia                                   | Fostinelli        |                              | PhD                     | MAC Memory Clinic and Molecular Markers Laboratory, IRCCS Istituto Centro San Giovanni di Dio Fatebenefratelli                                     | Brescia, Italy                                  | Co-investigator                                                |                                                                                                   |
| Roberta                                  | Ghidoni           |                              | PhD                     | Molecular Markers Laboratory, IRCCS Istituto Centro San Giovanni di Dio Fatebenefratelli                                                           | Brescia, Italy                                  | Co-investigator                                                |                                                                                                   |
| Valentina                                | Gnoni             |                              | MD                      | Center for Neurodegenerative Diseases and the Aging Brain, University of Bari-Aldo Moro at Pia Fondazione Cardinale Giovanni Panico, Tricase       | Tricase, Italy                                  | Co-investigator                                                |                                                                                                   |
| Genoveva                                 | Nacheva           |                              | PhD                     | Institute of Molecular Biology "Roumen Tsanev", Bulgarian Academy of Sciences                                                                      | Sofia, Bulgaria                                 | Co-investigator                                                |                                                                                                   |
| Ivana                                    | Novaković         |                              | MD                      | Neurology Clinic, Faculty of Medicine, University Clinical Center, University of Belgrade                                                          | Belgrade, Serbia                                | Co-investigator                                                |                                                                                                   |
| Alessandro                               | Padovani          |                              | MD                      | Neurology Unit, Department of Clinical and Experimental Sciences, University of Brescia                                                            | Brescia, Italy                                  | Co-investigator                                                |                                                                                                   |
| Ivo                                      | Popivanov         |                              | MD                      | Department for Cognitive Science and Psychology, New Bulgarian University                                                                          | Sofia, Bulgaria                                 | Co-investigator                                                |                                                                                                   |
| Margarita                                | Raycheva          |                              | MD                      | UH "Alexandrovska," Department of Neurology, Medical University Sofia                                                                              | Sofia, Bulgaria                                 | Co-investigator                                                |                                                                                                   |
| Katherine                                | Stockton          |                              | MD                      | Department of Clinical Neurosciences, MRC Cognition and Brain Sciences Unit, and Cambridge University Hospitals NHS Trust, University of Cambridge | Cambridge, UK                                   | Co-investigator                                                |                                                                                                   |
| Katya                                    | Stoyanova         |                              | MD                      | UH "Alexandrovska," Department of Neurology, Medical University Sofia                                                                              | Sofia, Bulgaria                                 | Co-investigator                                                |                                                                                                   |
| Noora-Maria                              | Suhonen           |                              | PhD                     | Neurocenter, Neurology, Oulu University Hospital                                                                                                   | Oulu, Finland                                   | Co-investigator                                                |                                                                                                   |
| Mikel                                    | Tainta            |                              | MD                      | Neuroscience Area, Biodonostia Health Research Institute                                                                                           | San Sebastian, Spain                            | Co-investigator                                                |                                                                                                   |
| Draga                                    | Toncheva          |                              | PhD                     | Department of Genetics, Medical University-Sofia                                                                                                   | Sofia, Bulgaria                                 | Co-investigator                                                |                                                                                                   |
| Daniele                                  | Urso              |                              | MD                      | Center for Neurodegenerative Diseases and the Aging Brain, University of Bari-Aldo Moro at Pia Fondazione Cardinale Giovanni Panico, Tricase       | Tricase, Italy                                  | Co-investigator                                                |                                                                                                   |
| Dora                                     | Zlatareva         |                              | MD                      | UH "Alexandrovska," Department of Radiology, Medical University Sofia                                                                              | Sofia, Bulgaria                                 | Co-investigator                                                |                                                                                                   |
| Miren                                    | Zulaica           |                              | PhD                     | Neuroscience Area, Biodonostia Health Research Institute                                                                                           | San Sebastian, Spain                            | Co-investigator                                                |                                                                                                   |
