# Supplementary material for: Incidence of Syndromes Associated With Frontotemporal Lobar Degeneration in 9 European Countries
Source: PubMed Central journal article supplement — JAMA Neurol. 2023 Jan 30;80(3):279–86. doi: 10.1001/jamaneurol.2022.5128 (PMC9887528; doi:10.1001/jamaneurol.2022.5128), 2023-01-30
Supplement: jamaneurol-e225128-s003.pdf [file jamaneurol-e225128-s003.pdf]

## Data Sharing Statement

Logroscino. Incidence of Syndromes Associated With Frontotemporal Lobar Degeneration in 9 European Countries. *JAMA Neurol.* Published January 30, 2023.  
doi:10.1001/jamaneurol.2022.5128

### Data

**Data available:** No
